# Supplementary material
Source: PubMed Central journal article supplement (PMC4023743)

Supplemental Figure S2: Characteristics of the *S. pyogenes* collection

| region         | source                | total no. isolates | resistant (MIC > 4 mg/l) |       | intermediate (MIC = 4 mg/l) |       | susceptible (MIC < 4 mg/l) |       |
|----------------|-----------------------|--------------------|--------------------------|-------|-----------------------------|-------|----------------------------|-------|
|                |                       |                    | no. isolates             | %     | no. isolates                | %     | no. isolates               | %     |
| Northern India | invasive              | 10                 | 10                       | 100.0 | 0                           | 0.0   | 0                          | 0.0   |
|                | pharyngitis           | 14                 | 4                        | 28.6  | 0                           | 0.0   | 10                         | 71.4  |
|                | skin                  | 19                 | 11                       | 57.9  | 1                           | 5.3   | 7                          | 36.8  |
|                | throat                | 38                 | 18                       | 47.4  | 0                           | 0.0   | 20                         | 52.6  |
|                | ND                    | 8                  | 6                        | 75.0  | 0                           | 0.0   | 2                          | 25.0  |
|                |                       | 89                 | 49                       | 55.1  | 1                           | 1.1   | 39                         | 43.8  |
| Southern India | invasive              | 29                 | 5                        | 17.2  | 0                           | 0.0   | 24                         | 82.8  |
|                | pharyngitis           | 10                 | 1                        | 10.0  | 0                           | 0.0   | 9                          | 90.0  |
|                | skin                  | 22                 | 2                        | 9.1   | 0                           | 0.0   | 20                         | 90.9  |
|                | throat                | 21                 | 1                        | 4.8   | 0                           | 0.0   | 20                         | 95.2  |
|                | ND                    | 97                 | 11                       | 11.3  | 3                           | 3.1   | 83                         | 85.6  |
|                |                       | 179                | 20                       | 11.2  | 3                           | 1.7   | 156                        | 87.2  |
| India          |                       | 268                | 69                       | 25.7  | 4                           | 1.5   | 195                        | 72.8  |
| Germany        | erysipelas            | 4                  | 0                        | 0.0   | 3                           | 75.0  | 1                          | 25.0  |
|                | meningitis            | 2                  | 0                        | 0.0   | 1                           | 50.0  | 1                          | 50.0  |
|                | otitis media          | 3                  | 0                        | 0.0   | 2                           | 66.7  | 1                          | 33.3  |
|                | pharyngitis           | 16                 | 0                        | 0.0   | 4                           | 25.0  | 12                         | 75.0  |
|                | phlegmon              | 2                  | 1                        | 50.0  | 0                           | 0.0   | 1                          | 50.0  |
|                | pneumonie             | 1                  | 0                        | 0.0   | 0                           | 0.0   | 1                          | 100.0 |
|                | sepsis                | 6                  | 3                        | 50.0  | 0                           | 0.0   | 3                          | 50.0  |
|                | septic Arthritis      | 1                  | 0                        | 0.0   | 1                           | 100.0 | 0                          | 0.0   |
|                | soft tissue infection | 1                  | 1                        | 100.0 | 0                           | 0.0   | 0                          | 0.0   |
|                | ND                    | 1                  | 0                        | 0.0   | 1                           | 100.0 | 0                          | 0.0   |
|                |                       | 37                 | 5                        | 13.5  | 12                          | 32.4  | 20                         | 54.1  |

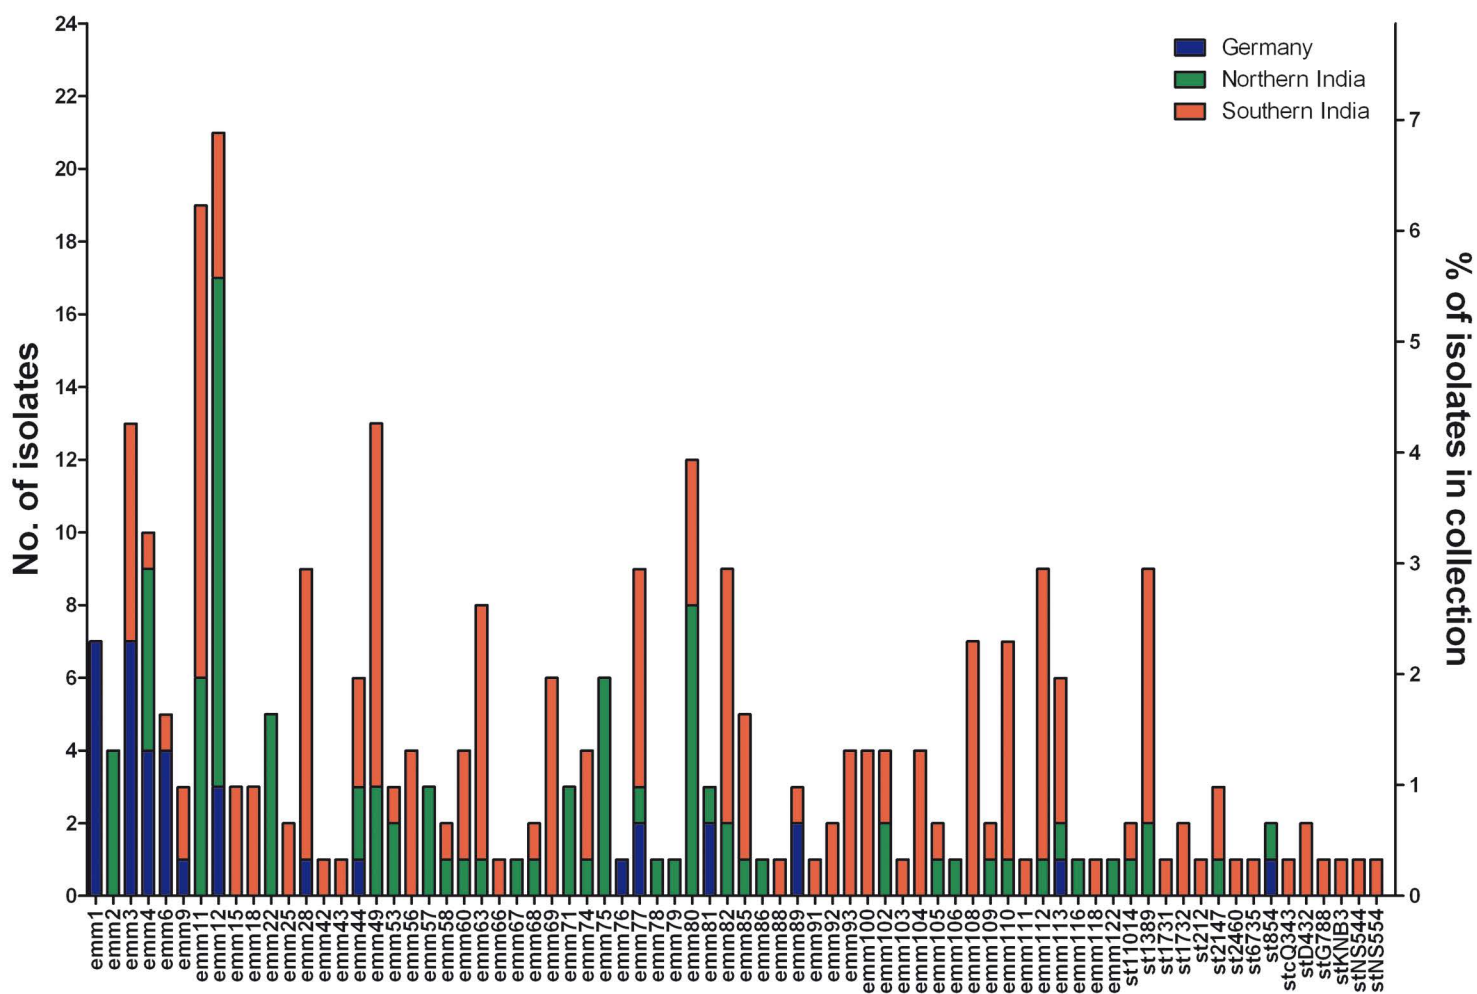

Supplement: AAC.02282-13_zac004142761so1.pdf [file AAC.02282-13_zac004142761so1.pdf]
